# Supplementary material for: Mechanical properties of epoxy nanocomposites filled with melamine functionalized molybdenum disulfide
Source: Royal Society of Chemistry journal article supplement (doi:10.1039/c8ra02689k), 2018-01-01
Supplement: c8ra02689k1.pdf [file c8ra02689k1.pdf]

## Mechanical properties of epoxy nanocomposites filled with melamine functionalized molybdenum disulfide

Bin Chen<sup>a</sup>, Bao-Jian Ni<sup>a</sup>, Wen-Tao Liu<sup>b</sup>, Qiu-Yang Ye<sup>b</sup>, Si-Yuan Liu<sup>b</sup>, He-Xin Zhang<sup>b,c\*</sup>, Keun-Byoung Yoon<sup>c\*</sup>

a. School of Materials Science and Engineering, Shenyang University of Chemical Technology, Shenyang 110142, China

b. School of Chemistry & Chemical Engineering, Anhui University of Technology, China

c. Department of Polymer Science and Engineering, Kyungpook National University, South Korea

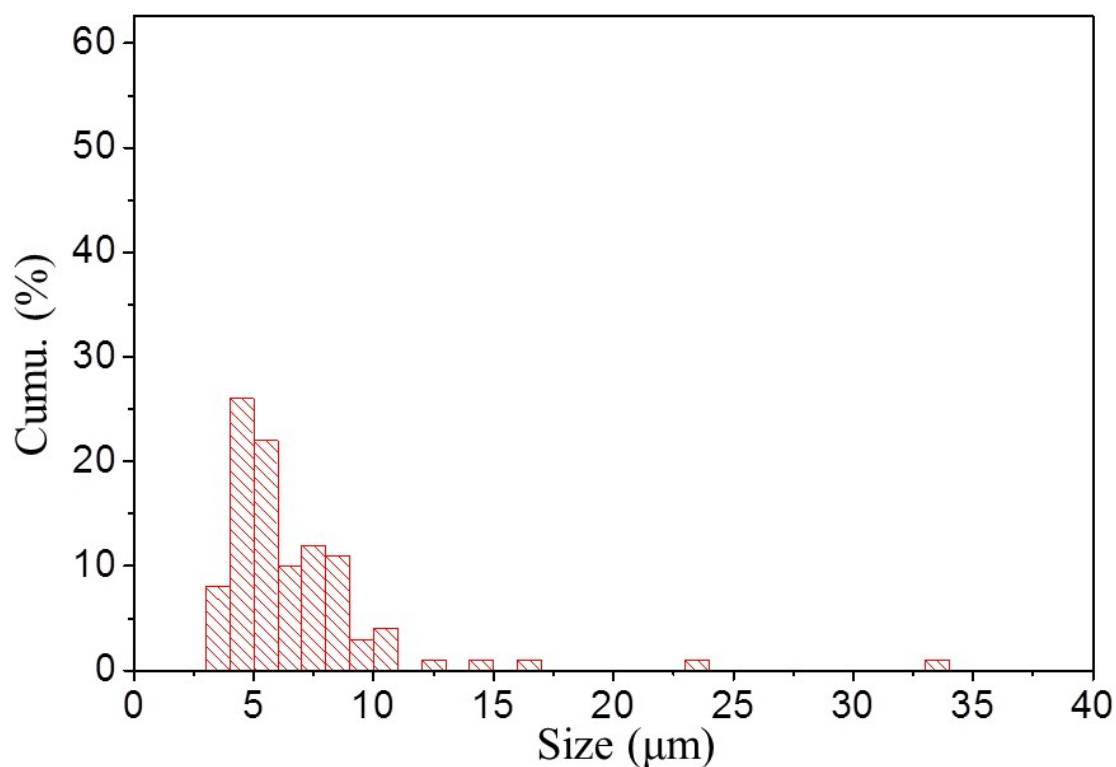

Figure S1. Size distribution of MoS<sub>2</sub>

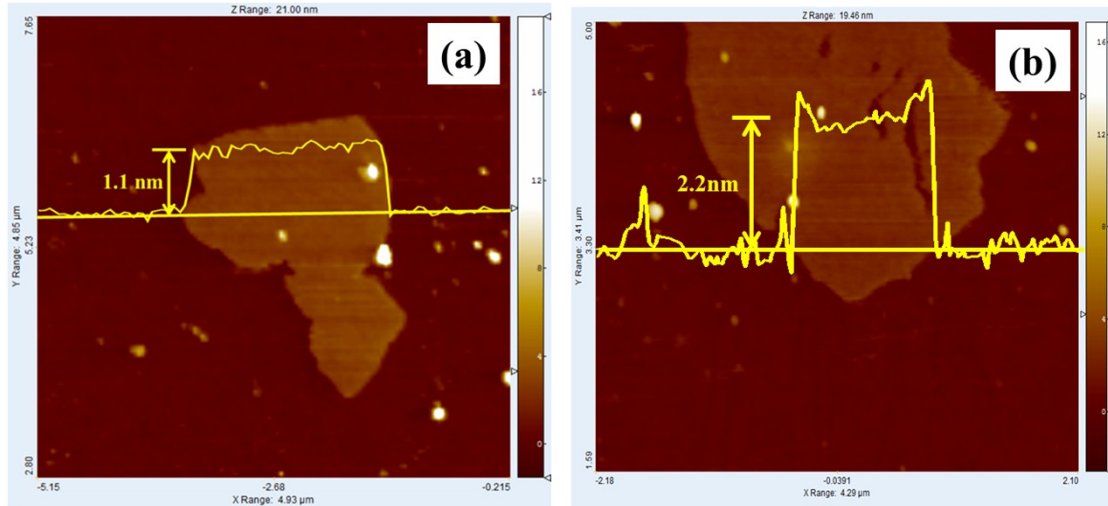

Figure S2. AFM image of exfoliated MoS<sub>2</sub> and M-MoS<sub>2</sub>

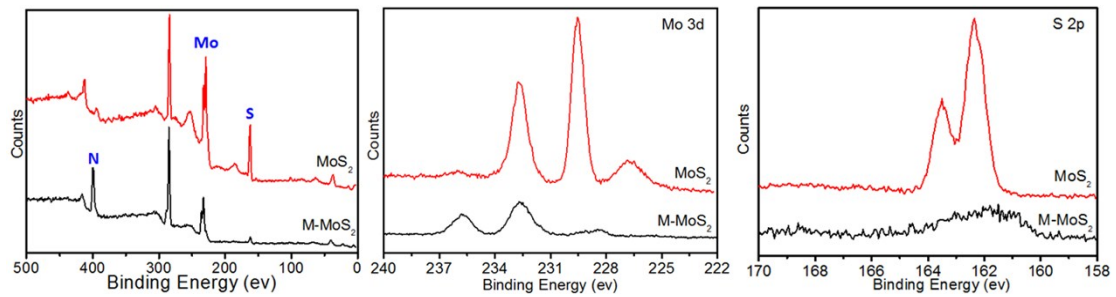

Figure S3. XPS curves of MoS<sub>2</sub> and M-MoS<sub>2</sub>

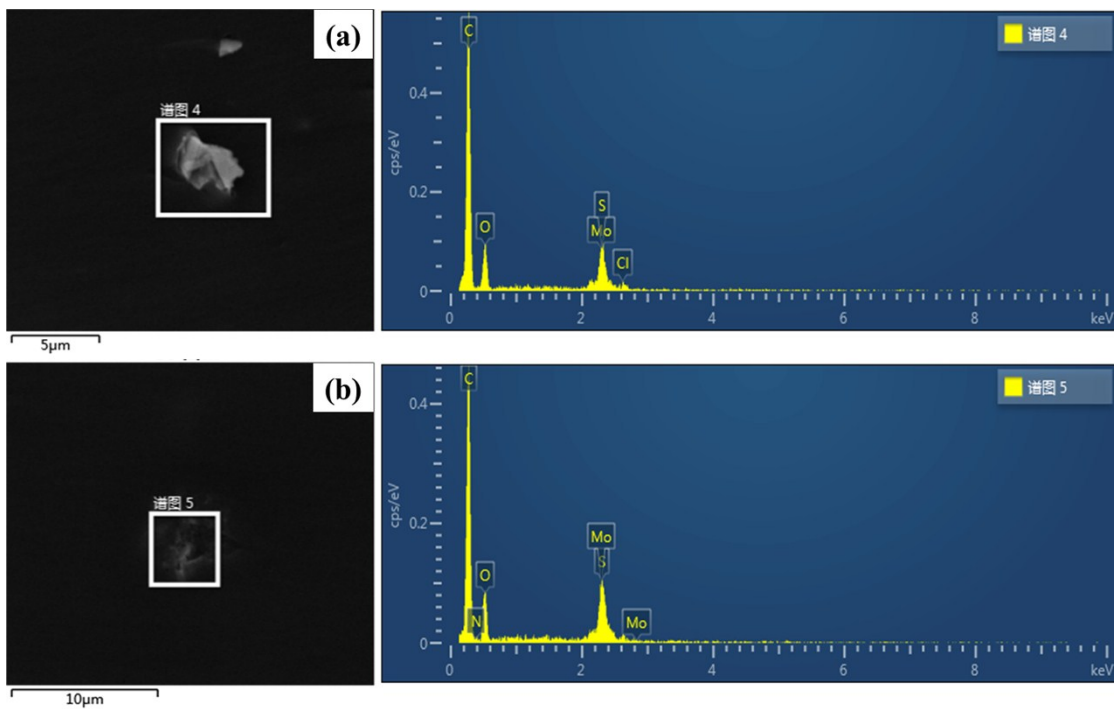

Figure S4. EDS analysis of (a)EP/MoS<sub>2</sub> and (b) EP/M-MoS<sub>2</sub> nanocomposite with 1 wt% filler addition
